# Supplementary material
Source: PubMed Central journal article supplement (PMC10543775)

## Supplementary Online Content

Chai PR, Dadabhoy FZ, Huang HW, et al. Assessment of the acceptability and feasibility of using mobile robotic systems for patient evaluation. *JAMA Netw Open*. 2021;4(3):e210667. doi:10.1001/jamanetworkopen.2021.0667

**eMethods.** National Survey Code Book

**eTable 1.** Participant Demographic Characteristics From National Survey

**eTable 2.** Participant Response Regarding Usefulness of Robotic Systems for Tasks in the Hospital in the National US Survey

**eFigure.** Emergency Department Cohort Study Enrollment Characteristics

This supplementary material has been provided by the authors to give readers additional information about their work.

## eMethods. National Survey Code Book

=====  
Project Code: MITU0032  
Project Name: Robotics in Healthcare  
Prepared for: Giovanni Traverso, Assistant Professor, MIT  
Interviews: 1000  
Field Period: August 18, 2020 - August 26, 2020  
Project Manager: Alexander Marsolais <alexander.marsolais@yougov.com>  
=====

YouGov interviewed 1119 respondents who were then matched down to a sample of 1000 to produce the final dataset. The respondents were matched to a sampling frame on gender, age, race, and education. The frame was constructed by stratified sampling from the full 2017 American Community Survey (ACS) 1-year sample with selection within strata by weighted sampling with replacements (using the person weights on the public use file).

The matched cases were weighted to the sampling frame using propensity scores. The matched cases and the frame were combined and a logistic regression was estimated for inclusion in the frame. The propensity score function included age, gender, race/ethnicity, years of education, and region. The propensity scores were grouped into deciles of the estimated propensity score in the frame and post-stratified according to these deciles.

The weights were then post-stratified on 2016 Presidential vote choice, and a four-way stratification of gender, age (4-categories), race (4-categories), and education (4-categories), to produce the final weight.

=====  
Variable List  
=====

|         |                |
|---------|----------------|
| caseid  | Case ID        |
| weight  | Gen Pop Weight |
| consent | consent        |

1. Q1\_1 Q1--I would feel uneasy if robots really had emotions.
2. Q1\_2 Q1 -- Something bad might happen if robots developed into living beings.
- 3.
- 4.
5. Q1\_3 Q1 -- I would feel relaxed talking with robots.
- 6.
7. Q1\_4 Q1 -- I would feel uneasy if I was given a job where I had to use robots.
- 8.
- 9.
10. Q1\_5 Q1 -- If robots had emotions, I would be able to make friends with them.
- 11.
- 12.
13. Q1\_6 Q1 -- I feel comforted being with robots that have emotions.
- 14.
- 15.
16. Q1\_7 Q1 -- The word "robot" means nothing to me.
- 17.
18. Q1\_8 Q1 -- I would feel nervous operating a robot in front of other people.
- 19.

20.

21. Q1\_9

Q1 -- I would hate the idea that robots or artificial intelligences were making judgments about things.

22.

23.  
24.

25. Q1\_10

Q1 -- I would feel very nervous just standing in front of a robot.

26.

27.

28. Q1\_11

Q1 -- I feel that if I depend on robots too much, something bad might happen.

29.

30.

31. Q1\_12

Q1 -- I would feel paranoid talking with a robot.

32.

33. Q1\_13

Q1 -- I am concerned that robots would be a bad influence on children.

34.

35.

36. Q1\_14

Q1 -- I feel that in the future society will be dominated by robots.

37.

38.

39. Q1\_15

Q1 -- It is acceptable to receive care through robots for my own safety.

40.

41.

42. Q1\_16

Q1 -- It is acceptable to receive care through robots for the safety of healthcare workers.

43.

44.

1. Q2\_1

Q2 -- Helping a patient get out of a chair

2.

3. Q2\_2

Q2 -- Detecting falls and calling for help

4.

5. Q2\_3

Q2 -- Vital signs assessment e.g. taking a patient's blood pressure, temperature, breathing rate, oxygen level or heart rate

6.

7.

8.

Q2\_4

Q2\_5

Q2\_6

Q2\_7

Q2\_8

Q2\_9

Q2\_10

Q2\_11

Q2\_12

Q2\_13

Q2\_14

Q2\_15

Q3\_1

Q3\_2

Q3\_3

Q3\_4

Q3\_5

Q3\_6

Q3\_7

Q3\_8

Q3\_9

Q3\_10

Q3\_11

Q3\_12

Q3\_13

Q3\_14

Q3\_15

Q4

birthyr

gender

race

educ

marstat

child18

employ

faminc\_new

pid3

pid7

presvote16post

inputstate

region

votereg

ideo5

newsint

religpew

religpew\_protestant

pew\_churatd

pew\_bornagain

pew\_religimp

pew\_prayer

genhealth

insurtype\_1

insurtype\_2

insurtype\_3

Q2 -- Helping make phone or video calls to a patient's family member

Q2 -- Dementia care e.g. telling the day/time

Q2 -- Walking assistance

Q2 -- Responding to call for assistance

Q2 -- Helping move or turn a patient in their bed

Q2 -- Helping a patient with their personal care (e.g., showering)

Q2 -- Facilitating a telemedicine interview with a patient's doctor or nurse

Q2 -- Performing nasal or oral swabs on a patient

Q2 -- Drawing blood from a patient for tests

Q2 -- Starting an intravenous (IV) line in a patient

Q2 -- Administer oral medications for a patient

Q2 -- Administer intravenous (IV) medications

Q3 -- Helping a patient get out of a chair

Q3 -- Detecting falls and calling for help

Q3 -- Vital signs assessment e.g. taking a

patient's blood pressure, temperature, breathing rate, oxygen level or heart rate  
Q3 -- Helping make phone or video calls to a patient's family member  
Q3 -- Dementia care e.g. telling the day/time  
Q3 -- Walking assistance  
Q3 -- Responding to call for assistance  
Q3 -- Helping move or turn a patient in their bed  
Q3 -- Helping a patient with their personal care (e.g., showering)  
Q3 -- Facilitating a telemedicine interview with a patient's doctor or nurse  
Q3 -- Performing nasal or oral swabs on a patient  
Q3 -- Drawing blood from a patient for tests  
Q3 -- Starting an intravenous (IV) line in a patient  
Q3 -- Administer oral medications for a patient  
Q3 -- Administer intravenous (IV) medications  
Q4  
Birth Year  
Gender  
Race  
Education  
Marital Status  
Children under age 18 in household  
Employment Status  
Family income  
3 point party ID  
7 point Party ID  
2016 President Vote Post Election  
State of Residence  
Region  
Voter Registration Status  
Ideology  
Political Interest  
Religion  
Protestant Church  
Church attendance (Pew version)  
Born Again (Pew version)  
Importance of religion (Pew version)  
Frequency of Prayer (Pew version)  
General health condition  
I have health insurance that is provided through my or a family member's employer, union, school, trade group or professional association  
I have health insurance provided through Medicare  
I have health insurance that I or a family member purchased directly from the health insurance company or HMO, not through an employer, union, insurtype\_4  
insurtype\_5  
insurtype\_99  
pp\_smoke100  
starttime  
endtime  
school, trade group or professional association  
I have health insurance through the military or through VA Benefits  
I have health insurance that is provided through a government health program, such as Medicaid

Not applicable - I do not have health insurance  
Smoking history  
Questionnaire Start Time  
Questionnaire End Time

Verbatims

=====  
employ\_t  
pid3\_t  
inputzip  
Employment Status - open  
3 point party ID - other  
Zip Input

Variable map and codebook

=====  
Name: caseid  
Description: Case ID  
Numeric Variable - no categories  
answered : 1000

=====  
Name: weight  
Description: Gen Pop Weight  
Numeric Variable - no categories  
answered : 1000

=====  
Name: consent  
Description: consent  
Count Code Label  
---- -  
1000 1 Yes  
0 2 No, please take me to another survey

=====  
Name: Q1\_1  
Description: Q1 -- I would feel uneasy if robots really had emotions.  
Count Code Label  
---- -  
54 1 Strongly disagree  
120 2 Disagree  
230 3 Neither agree nor disagree  
367 4 Agree  
229 5 Strongly agree

=====  
Name: Q1\_2  
Description: Q1 -- Something bad might happen if robots developed into living

beings.

Count Code Label  
---- -  
35 1 Strongly disagree  
83 2 Disagree  
204 3 Neither agree nor disagree  
383 4 Agree  
295 5 Strongly agree

=====  
Name: Q1\_3  
Description: Q1 -- I would feel relaxed talking with robots.  
Count Code Label  
---- -  
107 1 Strongly disagree

211 2 Disagree  
307 3 Neither agree nor disagree  
301 4 Agree  
74 5 Strongly agree

=====  
Name: Q1\_4  
Description: Q1 -- I would feel uneasy if I was given a job where I had to

use robots.

| Count | Code | Label                      |
|-------|------|----------------------------|
| 152   | 1    | Strongly disagree          |
| 386   | 2    | Disagree                   |
| 260   | 3    | Neither agree nor disagree |
| 128   | 4    | Agree                      |
| 74    | 5    | Strongly agree             |

=====  
Name: Q1\_5  
Description: Q1 -- If robots had emotions, I would be able to make friends

with them.

| Count | Code | Label                      |
|-------|------|----------------------------|
| 135   | 1    | Strongly disagree          |
| 211   | 2    | Disagree                   |
| 363   | 3    | Neither agree nor disagree |
| 233   | 4    | Agree                      |
| 58    | 5    | Strongly agree             |

=====  
Name: Q1\_6  
Description: Q1 -- I feel comforted being with robots that have emotions.

| Count | Code | Label                      |
|-------|------|----------------------------|
| 196   | 1    | Strongly disagree          |
| 295   | 2    | Disagree                   |
| 322   | 3    | Neither agree nor disagree |
| 140   | 4    | Agree                      |
| 47    | 5    | Strongly agree             |

=====  
Name: Q1\_7  
Description: Q1 -- The word "robot" means nothing to me.

| Count | Code | Label                      |
|-------|------|----------------------------|
| 135   | 1    | Strongly disagree          |
| 406   | 2    | Disagree                   |
| 304   | 3    | Neither agree nor disagree |
| 123   | 4    | Agree                      |
| 32    | 5    | Strongly agree             |

=====  
Name: Q1\_8  
Description: Q1 -- I would feel nervous operating a robot in front of other

people.

| Count | Code | Label |
|-------|------|-------|
|-------|------|-------|

145 1 Strongly disagree  
392 2 Disagree  
249 3 Neither agree nor disagree  
158 4 Agree  
56 5 Strongly agree

=====  
Name: Q1\_9

Description: Q1 -- I would hate the idea that robots or artificial  
intelligences were making judgments about things.

Count Code Label

-----

49 1 Strongly disagree  
190 2 Disagree  
257 3 Neither agree nor disagree  
309 4 Agree  
195 5 Strongly agree

=====  
Name: Q1\_10

Description: Q1 -- I would feel very nervous just standing in front of a  
robot.

Count Code Label

-----

176 1 Strongly disagree  
403 2 Disagree  
223 3 Neither agree nor disagree  
136 4 Agree  
62 5 Strongly agree

=====  
Name: Q1\_11

Description: Q1 -- I feel that if I depend on robots too much, something bad  
might happen.

Count Code Label

-----

53 1 Strongly disagree  
217 2 Disagree  
252 3 Neither agree nor disagree  
340 4 Agree  
137 5 Strongly agree

1 8 skipped

=====  
Name: Q1\_12

Description: Q1 -- I would feel paranoid talking with a robot.

Count Code Label

-----

104 1 Strongly disagree  
383 2 Disagree  
264 3 Neither agree nor disagree  
174 4 Agree  
75 5 Strongly agree

=====  
Name: Q1\_13

Description: Q1 -- I am concerned that robots would be a bad influence on  
children.



| Count | Code | Label                      |
|-------|------|----------------------------|
| 103   | 1    | Strongly disagree          |
| 302   | 2    | Disagree                   |
| 319   | 3    | Neither agree nor disagree |
| 184   | 4    | Agree                      |
| 92    | 5    | Strongly agree             |

=====  
Name: Q1\_14  
Description: Q1 -- I feel that in the future society will be dominated by

robots.

| Count | Code | Label                      |
|-------|------|----------------------------|
| 72    | 1    | Strongly disagree          |
| 243   | 2    | Disagree                   |
| 307   | 3    | Neither agree nor disagree |
| 293   | 4    | Agree                      |
| 85    | 5    | Strongly agree             |

=====  
Name: Q1\_15  
Description: Q1 -- It is acceptable to receive care through robots for my own

safety.

| Count | Code | Label                      |
|-------|------|----------------------------|
| 72    | 1    | Strongly disagree          |
| 128   | 2    | Disagree                   |
| 315   | 3    | Neither agree nor disagree |
| 401   | 4    | Agree                      |
| 84    | 5    | Strongly agree             |

=====  
Name: Q1\_16  
Description: Q1 -- It is acceptable to receive care through robots for the  
safety of healthcare workers.

| Count | Code | Label                      |
|-------|------|----------------------------|
| 69    | 1    | Strongly disagree          |
| 103   | 2    | Disagree                   |
| 242   | 3    | Neither agree nor disagree |
| 465   | 4    | Agree                      |
| 121   | 5    | Strongly agree             |

=====  
Name: Q2\_1  
Description: Q2 -- Helping a patient get out of a chair

| Count | Code | Label |
|-------|------|-------|
| 47    | 1    |       |
| 49    | 2    |       |
| 106   | 3    |       |
| 423   | 4    |       |
| 375   | 5    |       |

47 1

49 2  
106 3  
423 4  
375 5  
Extremely useless  
Somewhat useless

Neither useful nor useless  
Somewhat useful  
Extremely useful

=====  
Name: Q2\_2  
Description: Q2 -- Detecting falls and calling for help  
Count Code Label  
-----

24 1 29 2 79 3

312 4 556 5

Extremely useless  
Somewhat useless  
Neither useful nor useless  
Somewhat useful  
Extremely useful

=====  
Name: Q2\_3  
Description: Q2 -- Vital signs assessment e.g. taking a patient's blood  
pressure, temperature, breathing rate, oxygen level or heart

rate

Count Code Label  
-----

46 1

62 2  
129 3  
350 4  
413 5

Extremely useless  
Somewhat useless  
Neither useful nor useless  
Somewhat useful  
Extremely useful

=====  
Name: Q2\_4  
Description: Q2 -- Helping make phone or video calls to a patient's family

member

Count Code Label  
-----

57 1

90 2  
131 3  
368 4  
354 5

Extremely useless  
Somewhat useless

Neither useful nor useless  
Somewhat useful  
Extremely useful

=====  
Name: Q2\_5  
Description: Q2 -- Dementia care e.g. telling the day/time

Count Code Label  
---- -

50. 50 1  
51. 51 2

147 3  
386 4  
366 5

Extremely useless  
Somewhat useless  
Neither useful nor useless  
Somewhat useful  
Extremely useful

=====  
Name: Q2\_6  
Description: Q2 -- Walking assistance

Count Code Label  
---- -

39 1 49 2 98 3

403 4 411 5

Extremely useless  
Somewhat useless  
Neither useful nor useless  
Somewhat useful  
Extremely useful

=====  
Name: Q2\_7  
Description: Q2 -- Responding to call for assistance

Count Code Label  
---- -

45 1

79 2  
131 3  
360 4  
385 5

Extremely useless  
Somewhat useless  
Neither useful nor useless  
Somewhat useful  
Extremely useful

=====  
Name: Q2\_8  
Description: Q2 -- Helping move or turn a patient in their bed

Count Code Label  
---- -



Somewhat useful

Extremely useful

=====  
Name: Q2\_12

Description: Q2 -- Drawing blood from a patient for tests

Count Code Label

-----

170 1

197 2

217 3

249 4

167 5

Extremely useless

Somewhat useless

Neither useful nor useless

Somewhat useful

Extremely useful

=====  
Name: Q2\_13

Description: Q2 -- Starting an intravenous (IV) line in a patient

Count Code Label

-----

190 1

210 2

213 3

228 4

159 5

Extremely useless

Somewhat useless

Neither useful nor useless

Somewhat useful

Extremely useful

=====  
Name: Q2\_14

Description: Q2 -- Administer oral medications for a patient

Count Code Label

-----

115. 115 1

116. 116 2

197 3

358 4

214 5

Extremely useless

Somewhat useless

Neither useful nor useless

Somewhat useful

Extremely useful

=====  
Name: Q2\_15

Description: Q2 -- Administer intravenous (IV) medications

Count Code Label

-----

168 1

187 2

216 3

250 4

179 5

Extremely useless  
Somewhat useless  
Neither useful nor useless  
Somewhat useful  
Extremely useful

=====  
Name: Q3\_1  
Description: Q3 -- Helping a patient get out of a chair  
Count Code Label  
-----

49 1

57 2  
113 3  
358 4  
423 5

Extremely useless  
Somewhat useless  
Neither useful nor useless  
Somewhat useful  
Extremely useful

=====  
Name: Q3\_2  
Description: Q3 -- Detecting falls and calling for help  
Count Code Label  
-----

37 1 39 2 89 3

347 4 488 5

Extremely useless  
Somewhat useless  
Neither useful nor useless  
Somewhat useful  
Extremely useful

=====  
Name: Q3\_3  
Description: Q3 -- Vital signs assessment e.g. taking a patient's blood  
pressure, temperature, breathing rate, oxygen level or heart  
rate  
Count Code Label  
-----

76 1

62 2  
123 3  
336 4  
403 5

Extremely useless  
Somewhat useless  
Neither useful nor useless  
Somewhat useful  
Extremely useful

=====  
Name: Q3\_4

Description: Q3 -- Helping make phone or video calls to a patient's family

member

| Count | Code | Label |
|-------|------|-------|
| ----  | ---  | ----  |

571 Extremely useless 832 Somewhat useless

136 3  
353 4  
370 5

Neither useful nor useless  
Somewhat useful  
Extremely useful

1 8 skipped

=====

Name: Q3\_5  
Description: Q3 -- Dementia care e.g. telling the day/time  
Count Code Label  
---- -

47 1

68 2  
149 3  
357 4  
379 5

Extremely useless  
Somewhat useless  
Neither useful nor useless  
Somewhat useful  
Extremely useful

=====

Name: Q3\_6  
Description: Q3 -- Walking assistance  
Count Code Label  
---- -

53 1

51 2  
109 3  
373 4  
414 5

Extremely useless  
Somewhat useless  
Neither useful nor useless  
Somewhat useful  
Extremely useful

=====

Name: Q3\_7  
Description: Q3 -- Responding to call for assistance  
Count Code Label  
---- -

50 1

69 2  
120 3  
364 4  
397 5

Extremely useless  
Somewhat useless  
Neither useful nor useless  
Somewhat useful  
Extremely useful

=====

Name: Q3\_8  
Description: Q3 -- Helping move or turn a patient in their bed  
Count Code Label  
---- -- ----

64 1

91 2  
136 3  
331 4  
378 5

Extremely useless  
Somewhat useless  
Neither useful nor useless  
Somewhat useful  
Extremely useful

=====

Name: Q3\_9  
Description: Q3 -- Helping a patient with their personal care (e.g.,

showering)

Count Code Label  
---- -- ----  
102 1  
146 2  
158 3  
311 4  
283 5

Extremely useless  
Somewhat useless  
Neither useful nor useless  
Somewhat useful  
Extremely useful

=====

Name: Q3\_10  
Description: Q3 -- Facilitating a telemedicine interview with a patient's  
doctor or nurse  
Count Code Label  
---- -- ----

77 1

90 2  
168 3  
351 4



314 5  
Extremely useless  
Somewhat useless  
Neither useful nor useless  
Somewhat useful  
Extremely useful

=====  
Name: Q3\_11  
Description: Q3 -- Performing nasal or oral swabs on a patient

| Count | Code | Label |
|-------|------|-------|
| 116   | 1    |       |
| 163   | 2    |       |
| 195   | 3    |       |
| 287   | 4    |       |
| 239   | 5    |       |

Extremely useless  
Somewhat useless  
Neither useful nor useless  
Somewhat useful  
Extremely useful

=====  
Name: Q3\_12  
Description: Q3 -- Drawing blood from a patient for tests

| Count | Code | Label |
|-------|------|-------|
| 152   | 1    |       |
| 194   | 2    |       |
| 203   | 3    |       |
| 236   | 4    |       |
| 215   | 5    |       |

Extremely useless  
Somewhat useless  
Neither useful nor useless  
Somewhat useful  
Extremely useful

=====  
Name: Q3\_13  
Description: Q3 -- Starting an intravenous (IV) line in a patient

| Count | Code | Label |
|-------|------|-------|
|-------|------|-------|

167 1  
  
198. 198 2  
199. 199 3

228 4 208 5

Extremely useless  
Somewhat useless  
Neither useful nor useless  
Somewhat useful  
Extremely useful

=====  
Name: Q3\_14  
Description: Q3 -- Administer oral medications for a patient

| Count | Code | Label |
|-------|------|-------|
|-------|------|-------|

```

-----
108  1
106  2
182  3
331  4
273  5

```

Extremely useless  
 Somewhat useless  
 Neither useful nor useless  
 Somewhat useful  
 Extremely useful

```

=====
Name:      Q3_15
Description: Q3 -- Administer intravenous (IV) medications

```

```

      Count  Code  Label
-----

```

```

155  1
183  2
194  3

```

Extremely useless  
 Somewhat useless  
 Neither useful nor useless

```

      246  4  Somewhat useful
      222  5  Extremely useful

```

```

=====
Name:      Q4
Description: Q4

```

```

      Count  Code  Label
-----

```

```

      99  1  Totally unacceptable
     100  2  Unacceptable
     213  3  Neither unacceptable nor acceptable
     396  4  Acceptable
     192  5  Totally acceptable

```

```

=====
Name:      birthyr
Description: Birth Year
      Numeric Variable - no categories
      answered      : 1000

```

```

=====
Name:      gender
Description: Gender

```

```

      Count  Code  Label
-----

```

```

     465  1  Male
     535  2  Female

```

```

=====
Name:      race
Description: Race

```

```

      Count  Code  Label
-----

```

```

     719  1  White
     86  2  Black
     103  3  Hispanic
     40  4  Asian
     9  5  Native American
     17  6  Mixed
     25  7  Other
     1  8  Middle Eastern

```

Name: educ  
Description: Education

Count Code Label ----- 36 1NoHS

|     |   |                      |
|-----|---|----------------------|
| 287 | 2 | High school graduate |
| 235 | 3 | Some college         |
| 106 | 4 | 2-year               |
| 221 | 5 | 4-year               |
| 115 | 6 | Post-grad            |

=====  
Name: marstat  
Description: Marital Status  
Count Code Label

| Count | Code | Label         |
|-------|------|---------------|
| 465   | 1    | Married       |
| 21    | 2    | Separated     |
| 112   | 3    | Divorced      |
| 66    | 4    | Widowed       |
| 292   | 5    | Never married |

446 Domestic / civil partnership

=====  
Name: child18  
Description: Children under age 18 in household  
Count Code Label

|     |   |     |
|-----|---|-----|
| 237 | 1 | Yes |
|-----|---|-----|

763 2No

=====  
Name: employ  
Description: Employment Status  
Count Code Label

|     |   |                      |
|-----|---|----------------------|
| 336 | 1 | Full-time            |
| 104 | 2 | Part-time            |
| 39  | 3 | Temporarily laid off |
| 82  | 4 | Unemployed           |
| 205 | 5 | Retired              |
| 92  | 6 | Permanently disabled |
| 72  | 7 | Homemaker            |
| 50  | 8 | Student              |
| 20  | 9 | Other                |

=====  
Name: faminc\_new  
Description: Family income  
Count Code Label

73 1

|     |   |
|-----|---|
| 78  | 2 |
| 104 | 3 |
| 94  | 4 |

62 5  
79 6  
73 7

66. 66 8  
67. 67 9

55 10  
54 11  
31 12  
13 13  
12 14  
4 15  
6 16  
129 97

Less than \$10,000  
\$10,000 - \$19,999  
\$20,000 - \$29,999  
\$30,000 - \$39,999  
\$40,000 - \$49,999  
\$50,000 - \$59,999  
\$60,000 - \$69,999  
\$70,000 - \$79,999  
\$80,000 - \$99,999  
\$100,000 - \$119,999  
\$120,000 - \$149,999  
\$150,000 - \$199,999  
\$200,000 - \$249,999  
\$250,000 - \$349,999  
\$350,000 - \$499,999  
\$500,000 or more  
Prefer not to say

=====  
Name: pid3  
Description: 3 point party ID  
Count Code Label  
---- -- ----  
362 1 Democrat  
229 2 Republican  
301 3 Independent

58 4 Other  
50 5 Notsure

=====  
Name: pid7  
Description: 7 point Party ID  
Count Code Label  
---- -- ----  
253 1  
109 2  
106 3  
160 4 Independent

96 5

64 6

165 7  
47 8  
0 9

Lean Republican  
Not very strong Republican Strong Republican  
Notsure  
Don'tknow

Strong Democrat  
Not very strong Democrat  
Lean Democrat

=====  
Name: presvote16post  
Description: 2016 President Vote Post Election  
Count Code Label

-----  
327 1  
268 2  
31 3  
24 4  
5 5

Hillary Clinton  
Donald Trump  
Gary Johnson  
Jill Stein

Evan McMullin  
18 6 Other  
327 7 Did not vote for President

=====  
Name: inputstate  
Description: State of Residence  
Count Code Label

-----  
19 1 Alabama  
1 2 Alaska  
27 4 Arizona  
16 5 Arkansas  
92 6 California  
16 8 Colorado  
4 9 Connecticut  
1 10 Delaware  
4 11 District of Columbia  
74 12 Florida  
20 13 Georgia  
3 15 Hawaii  
10 16 Idaho  
38 17 Illinois  
24 18 Indiana

9 19 Iowa

8 20 Kansas  
11 21 Kentucky  
14 22 Louisiana  
3 23 Maine  
13 24 Maryland  
17 25 Massachusetts  
25 26 Michigan

16 27 Minnesota  
3 28 Mississippi  
18 29 Missouri

6 30 Montana

7 31 Nebraska  
19 32 Nevada  
2 33  
41 34  
7 35  
61 36  
32 37  
4 38

New Hampshire New Jersey  
New Mexico New York  
North Carolina North Dakota

31 39 Ohio  
7 40 Oklahoma  
18 41 Oregon  
52 42 Pennsylvania

0 44 18 45 5 46

Rhode Island  
South Carolina  
South Dakota  
30 47 Tennessee  
75 48 Texas

8 49 Utah

2 50 Vermont  
28 51 Virginia  
30 53 Washington  
7 54 West Virginia  
20 55 Wisconsin  
4 56 Wyoming  
0 60 American Samoa  
0 64 Federated States of Micronesia  
0 66 Guam  
0 68 Marshall Islands  
0 69 Northern Mariana Islands  
0 70 Palau  
0 72  
0 74  
0 78  
0 81 Alberta  
0 82 British Columbia  
0 83 Manitoba  
Puerto Rico  
U.S. Minor Outlying Islands  
Virgin Islands  
0 84 New Brunswick  
0 85 Newfoundland

0 86 Northwest Territories  
 0 87 Nova Scotia  
 0 88 Nunavut  
 0 89 Ontario  
 0 90 Prince Edward Island  
 0 91 Quebec  
 0 92 Saskatchewan  
 0 93 Yukon Territory  
 0 99 Not in the U.S. or Canada

```
=====
Name:      region
Description: Region
Count  Code  Label
-----  -
182    1    Northeast
205    2    Midwest
372    3    South
241    4    West
=====
```

```
=====
Name:      votereg
Description: Voter Registration Status
Count  Code  Label
-----  -
848    1    Yes
=====
```

130 2No  
 22 3 Don't know

```
=====
Name:      ideo5
Description: Ideology
Count  Code  Label
-----  -
118    1    Very liberal
166    2    Liberal
318    3    Moderate
189    4    Conservative
119    5    Very conservative
=====
```

90 6 Notsure

```
=====
Name:      newsint
Description: Political Interest
Count  Code  Label
-----  -
513    1
272    2
106    3
=====
```

67 4 42 7

Most of the time  
 Some of the time  
 Only now and then  
 Hardly at all  
 Don't know

Name: religpew

Description: Religion

| Count | Code | Label |
|-------|------|-------|
|-------|------|-------|

-----

|     |    |                           |
|-----|----|---------------------------|
| 313 | 1  | Protestant                |
| 180 | 2  | Roman Catholic            |
| 12  | 3  | Mormon                    |
| 7   | 4  | Eastern or Greek Orthodox |
| 30  | 5  | Jewish                    |
| 18  | 6  | Muslim                    |
| 13  | 7  | Buddhist                  |
| 1   | 8  | Hindu                     |
| 62  | 9  | Atheist                   |
| 65  | 10 | Agnostic                  |
| 220 | 11 | Nothing in particular     |
| 79  | 12 | Something else            |

=====  
Name: religpew\_protestant

Description: Protestant Church

| Count | Code | Label |
|-------|------|-------|
|-------|------|-------|

-----

|     |    |                                           |
|-----|----|-------------------------------------------|
| 114 | 1  | Baptist                                   |
| 41  | 2  | Methodist                                 |
| 74  | 3  | Nondenominational or Independent Church   |
| 39  | 4  | Lutheran                                  |
| 22  | 5  | Presbyterian                              |
| 24  | 6  | Pentecostal                               |
| 13  | 7  | Episcopalian                              |
| 16  | 8  | Church of Christ or Disciples of Christ   |
| 8   | 9  | Congregational or United Church of Christ |
| 3   | 10 | Holiness                                  |
| 4   | 11 | Reformed                                  |
| 5   | 12 | Adventist                                 |
| 9   | 13 | Jehovah's Witness                         |
| 19  | 90 | Something else                            |
| 609 | 98 | skipped                                   |

=====  
Name: pew\_churatd

Description: Church attendance (Pew version)

| Count | Code | Label |
|-------|------|-------|
|-------|------|-------|

-----

72 1 174 2 66 3

More than once a week

Once a week

Once or twice a month

|     |   |                    |
|-----|---|--------------------|
| 131 | 4 | A few times a year |
| 195 | 5 | Seldom             |
| 341 | 6 | Never              |

217 Don't know

=====  
Name: pew\_bornagain

Description: Born Again (Pew version)

| Count | Code | Label |
|-------|------|-------|
|-------|------|-------|

-----

|     |   |     |
|-----|---|-----|
| 300 | 1 | Yes |
|-----|---|-----|



700 2No

=====  
Name: pew\_religimp  
Description: Importance of religion (Pew version)

Count Code Label

---- --

393 1

227 2

144 3

236 4

Very important

Somewhat important

Not too important

Not at all important

=====  
Name: pew\_prayer  
Description: Frequency of Prayer (Pew version)

Count Code Label

---- --

290 1

124 2

121 3

25 4

Several times a day

Once a day

A few times a week

Once a week

57 5

134 6 Seldom

209 7 Never

A few times a month

40 8 Don't know

=====  
Name: genhealth  
Description: General health condition

Count Code Label

---- --

137 1 Excellent

343 2 Very good

313 3 Good

167 4 Fair

40 5 Poor

=====  
Name: insurtype\_1  
Description: I have health insurance that is provided through my or a family member's employer, union, school, trade group or professional association

Count Code Label

---- --

418 1 selected

582 2 not selected

=====  
Name: insurtype\_2

Description: I have health insurance provided through Medicare

| Count | Code | Label        |
|-------|------|--------------|
| 248   | 1    | selected     |
| 752   | 2    | not selected |

Name: insurtype\_3

Description: I have health insurance that I or a family member purchased directly from the health insurance company or HMO, not through an employer, union, school, trade group or professional association

| Count | Code | Label        |
|-------|------|--------------|
| 104   | 1    | selected     |
| 896   | 2    | not selected |

Name: insurtype\_4

Description: I have health insurance through the military or through VA

#### Benefits

| Count | Code | Label        |
|-------|------|--------------|
| 47    | 1    | selected     |
| 953   | 2    | not selected |

Name: insurtype\_5

Description: I have health insurance that is provided through a government health program, such as Medicaid

| Count | Code | Label        |
|-------|------|--------------|
| 152   | 1    | selected     |
| 848   | 2    | not selected |

Name: insurtype\_99

Description: Not applicable - I do not have health insurance

| Count | Code | Label        |
|-------|------|--------------|
| 119   | 1    | selected     |
| 881   | 2    | not selected |

Name: pp\_smoke100

Description: Smoking history

| Count | Code | Label |
|-------|------|-------|
| 433   | 1    | Yes   |

567 2No

#### Date format variables

Name: starttime

Description: Questionnaire Start Time  
DateTime variable - no categories

Name: endtime

Description: Questionnaire End Time  
DateTime variable - no categories

**eTable 1.** Participant Demographic Characteristics From National Survey

|                               |               |
|-------------------------------|---------------|
| Demographic                   | N= 1000       |
| Age (years)                   | 48.7 +/- 17.0 |
| Sex                           |               |
| Male                          | 465 (46.5%)   |
| Female                        | 535 (53.4%)   |
| Geography (Regions by Census) |               |
| Northeast                     | 182 (18.2%)   |
| Midwest                       | 205 (20.5%)   |
| South                         | 372 (37.2%)   |
| West                          | 241 (24.1%)   |
| Ethnicity                     |               |
| White or Caucasian            | 719 (71.9%)   |
| Black or African American     | 86 (8.6%)     |
| Latino or Hispanic            | 103 (10.3%)   |
| Asian                         | 40 (4.0%)     |
| Native American               | 9 (0.90%)     |
| Middle Eastern                | 1 (0.10%)     |
| Mixed                         | 17 (1.7%)     |
| Other                         | 25 (2.5%)     |
| Education                     |               |
| No high school                | 36 (3.6%)     |
| High school graduate          | 287 (28.7%)   |
| Some college                  | 235 (23.5%)   |
| 2-year college degree         | 106 (10.6%)   |
| 4-year college degree         | 221 (22.1%)   |
| Post-graduate                 | 115 (11.5%)   |

**eTable 2.** Participant Response Regarding Usefulness of Robotic Systems for Tasks in the Hospital in the National US Survey

|                                                                                                                                                                                                                                         | Usefulness of Robotic Systems for hospital tasks                                             | Usefulness of Robotic Systems for hospital tasks in context of COVID-19                      | p-value |
|-----------------------------------------------------------------------------------------------------------------------------------------------------------------------------------------------------------------------------------------|----------------------------------------------------------------------------------------------|----------------------------------------------------------------------------------------------|---------|
| Facilitating telemedicine interview with physician or nurse<br>1-Extremely Useless<br>2-Somewhat Useless<br>3-Neither Useful nor Useless<br>4- Somewhat Useful<br>5-Extremely Useful<br><br><i>Median Score</i><br><i>IQR (p75-p25)</i> | 68 (6.8%)<br>94 (9.4%)<br>178 (17.8%)<br>373 (37.3%)<br>287 (28.7%)<br><br>4<br>(5-3)=2      | 77 (7.7%)<br>90 (9.0%)<br>168 (16.8%),<br>351 (35.1%)<br>314 (31.4%)<br><br>4<br>(5-3)=2     | 0.16    |
| Acquisition of contactless vital signs<br>1-Extremely Useless<br>2-Somewhat Useless<br>3- Neither Useful nor Useless<br>4- Somewhat Useful<br>5-Extremely Useful<br><br><i>Median Score</i><br><i>IQR (p75-p25)</i>                     | 46 (4.6%)<br>62 (6.2%)<br>129 (12.9%)<br>350 (35.0%)<br>413 (41.3%)<br><br>4<br>(5-4) =1     | 76 (7.6%)<br>62 (6.2%)<br>123 (12.3%)<br>336 (33.6%)<br>403 (40.3%)<br><br>4<br>(5-3) =2     | 0.0003  |
| Obtaining nasal or oral swabs<br>1-Extremely Useless<br>2-Somewhat Useless<br>3- Neither Useful nor Useless<br>4- Somewhat Useful<br>5-Extremely Useful<br><br><i>Median Score</i><br><i>IQR (p75-p25)</i>                              | 120 (12.0%)<br>168 (16.8%)<br>213 (21.3%)<br>307 (30.7%)<br>192 (19.2%)<br><br>3<br>(4-2) =2 | 116 (11.6%)<br>163 (16.3%)<br>195 (19.5%)<br>287 (28.7%)<br>239 (23.9%)<br><br>4<br>(4-2) =2 | 0.002   |
| Placing an intravenous catheter<br>1-Extremely Useless<br>2-Somewhat Useless<br>3- Neither Useful nor Useless<br>4- Somewhat Useful<br>5-Extremely Useful                                                                               | 190 (19.0%)<br>210 (21.0%)<br>213 (21.3%)<br>228 (22.8%)<br>159 (15.9%)                      | 167 (16.7%)<br>198 (19.8%)<br>199 (19.9%)<br>228 (22.8%)<br>208 (20.8%)                      | <0.001  |

|                                                                                                                                                                                                                        |                                                                                              |                                                                                              |        |
|------------------------------------------------------------------------------------------------------------------------------------------------------------------------------------------------------------------------|----------------------------------------------------------------------------------------------|----------------------------------------------------------------------------------------------|--------|
| <i>Median Score</i><br><i>IQR (p75-p25)</i>                                                                                                                                                                            | 3<br>(4-2) =2                                                                                | 3<br>(4-2) =2                                                                                |        |
| Performing phlebotomy<br>1-Extremely Useless<br>2-Somewhat Useless<br>3- Neither Useful nor Useless<br>4- Somewhat Useful<br>5-Extremely Useful<br><br><i>Median Score</i><br><i>IQR (p75-p25)</i>                     | 170 (17.0%)<br>197 (19.7%)<br>217 (21.7%)<br>249 (24.9%)<br>167 (16.7%)<br><br>3<br>(4-2) =2 | 152 (15.2%)<br>194 (19.4%)<br>203 (20.3%)<br>236 (23.6%)<br>215 (21.5%)<br><br>3<br>(4-2) =2 | <0.001 |
| Helping position or turn a patient in bed<br>1-Extremely Useless<br>2-Somewhat Useless<br>3- Neither Useful nor Useless<br>4- Somewhat Useful<br>5-Extremely Useful<br><br><i>Median score</i><br><i>IQR (p75-p25)</i> | 59 (5.9%)<br>63 (6.3%)<br>136 (13.6%)<br>371 (37.1%)<br>371 (37.1%)<br><br>4<br>(5-3) =2     | 64 (6.4%)<br>91 (9.1%)<br>136 (13.6%)<br>331 (33.1%)<br>378 (37.8%)<br><br>4<br>(5-3) =2     | 0.04   |
| N=1000<br>*Survey scores using a 5-Point Likert Scale                                                                                                                                                                  |                                                                                              |                                                                                              |        |

**eFigure.** Emergency Department Cohort Study Enrollment Characteristics

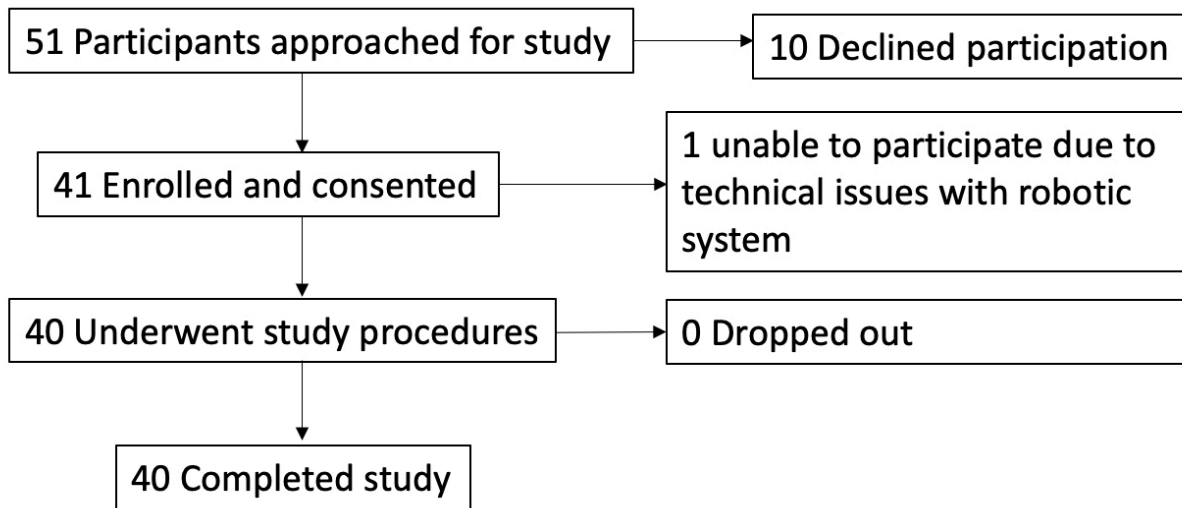

Supplement: jamanetwopen-e210667-s001.pdf [file jamanetwopen-e210667-s001.pdf]
